# Supplementary material for: Prevalence and Predictors of Unhealthy Food Consumption among Children Under Two Years: Findings from Bangladesh Demographic and Health Survey 2022
Source: Research Square preprint supplement (doi:10.21203/rs.3.rs-7004394/v1), 2025-09-22
Supplement: Supplementary file 1 [file d28cf6f48bfeb21bd3c9eb6d.docx]

**Supplementary Table S1:** Background characteristics of the children aged 0-23 months in Bangladesh who had unhealthy food the night preceding the survey (BDHS-2022).

| **Variables** | **n=3519**  **n (%)** |
| --- | --- |
| **Division** |  |
| Barishal | 210 (6.0) |
| Chattogram | 765 (21.7) |
| Dhaka | 877 (24.9) |
| Khulna | 364 (10.3) |
| Mymensingh | 317 (9.0) |
| Rajshahi | 366 (10.4) |
| Rangpur | 399 (11.3) |
| Sylhet | 220 (6.3) |
| **Type of place of residence** |  |
| Urban | 943 (26.8) |
| Rural | 2576 (73.2) |
| **Household size** |  |
| Less than or equal to 4 | 1072 (30.5) |
| More than 4 | 2447 (69.5) |
| **Sex of household head** |  |
| Male | 3114 (88.5) |
| Female | 405 (11.5) |
| **Wealth index combined** |  |
| Poorest | 705 (20.0) |
| Poorer | 744 (21.1) |
| Middle | 745 (21.2) |
| Richer | 692 (19.7) |
| Richest | 633 (18.0) |
| **Mother's age in 5-year groups** |  |
| 15-19 | 597 (17.0) |
| 20-24 | 1194 (33.9) |
| 25-29 | 910 (25.9) |
| 30-34 | 565 (16.1) |
| 35-39 | 219 (6.2) |
| 40-44 | 31 (0.9) |
| 45-49 | 4 (0.1) |
| **Father's age** | N=3492 |
| Less than 25 years | 425 (12.2) |
| 25-29 | 760 (21.8) |
| 30-34 | 876 (25.1) |
| 35-39 | 789 (22.6) |
| 40 years and above | 643 (18.4) |
| **Mother’s highest educational level** |  |
| No education | 176 (5.0) |
| Primary | 784 (22.3) |
| Secondary | 1904 (54.1) |
| Higher | 655 (18.6) |
| **Father's highest educational level** | N=3485 |
| No education | 516 (14.8) |
| Primary | 1009 (28.9) |
| Secondary | 1230 (35.3) |
| Higher | 730 (20.9) |
| **Mother currently working** |  |
| No | 2814 (80.0) |
| Yes | 705 (20.0) |
| **Mass media exposure of the mother (newspaper/radio/television)** |  |
| Unexposed | 1537 (43.7) |
| Exposed | 1982 (56.3) |
| **The anxiety level of the mother (from GAD-7 scores)** |  |
| Minimal Anxiety | 2795 (79.4) |
| Mild to severe anxiety | 724 (20.6) |
| **Depression level of the mother (from PHQ-9 scores)** |  |
| Minimal or no depression | 2654 (75.4) |
| Mild to severe depression | 865 (24.6) |
| **BMI of the mother (according to CDC)** |  |
| Underweight (<18.5) | 284 (16.0) |
| Normal (18.5-24.9) | 1060 (59.7) |
| Overweight (25-29.9) | 347 (19.5) |
| Obesity (>30.0) | 85 (4.8) |
| **Age of the index child** |  |
| 0-5 months | 941 (26.7) |
| 6-11 months | 978 (27.8) |
| 12-17 months | 749 (21.3) |
| 18-23 months | 851 (24.2) |
| **Gender of the child** |  |
| Boy | 1790 (50.9) |
| Girl | 1729 (49.1) |
| **Birth order** |  |
| 1 | 1391 (39.5) |
| 2 | 1172 (33.3) |
| 3 or more | 956 (27.2) |
| **Currently breastfeeding** |  |
| No | 221 (6.3) |
| Yes | 3298 (93.7) |
| **Birth weight** |  |
| Low birth weight (up to 2500gm) | 609 (17.3) |
| More than 2500gm | 1699 (48.3) |
| Didn't measure/don’t know | 1211 (34.4) |
| **Both mother and child had PNC** |  |
| No | 994 (28.2) |
| Yes | 2525 (71.8) |
| **Place of delivery** |  |
| Non-institutional | 1230 (35.0) |
| Public sector | 604 (17.2) |
| Private sector | 1685 (47.9) |

**Supplementary Table S2:** Association between different background variables and consumption of unhealthy food by children aged 0-23 months in Bangladesh (BDHS-2022) using the Chi-Square test

| **Variables** | **Consumption of sweetened beverages** | **Consumption of unhealthy sentinel food** | **Consumption of zero vegetables or fruits** |
| --- | --- | --- | --- |
| **Division** | *p =* 0.445 | *p* < 0.001 | *p* < 0.001 |
| Barishal | 47 (22.4) | 54 (25.6) | 127 (61.7) |
| Chattogram | 184 (24.1) | 232 (30.3) | 500 (66.2) |
| Dhaka | 241 (27.5) | 288 (32.8) | 528 (60.8) |
| Khulna | 95 (26.1) | 176 (48.2) | 192 (53.2) |
| Mymensingh | 79 (24.9) | 130 (40.9) | 180 (58.1) |
| Rajshahi | 89 (24.3) | 139 (38.0) | 227 (62.5) |
| Rangpur | 90 (22.6) | 215 (53.9) | 204 (51.5) |
| Sylhet | 48 (21.7) | 75 (34.1) | 129 (59.4) |
| **Type of place of residence** | *p =* 0.010 | *p =* 0.244 | *p =* 0.138 |
| Urban | 263 (27.9) | 336 (35.6) | 543 (58.0) |
| Rural | 610 (23.7) | 972 (37.7) | 1544 (60.8) |
| **Household size** | *p =* 0.031 | *p =* 0.009 | *p =* 0.053 |
| Less than or equal to 4 | 291 (27.1) | 433 (40.4) | 612 (57.6) |
| More than 4 | 581 (23.7) | 875 (35.8) | 1476 (61.1) |
| **Sex of household head** | *p =* 0.757 | *p =* 0.617 | *p =* 0.681 |
| Male | 770 (24.7) | 1152 (37.0) | 1844 (59.9) |
| Female | 103 (25.4) | 155 (38.3) | 244 (61.0) |
| **Wealth index combined** | p < 0.001 | p = 0.176 | p < 0.001 |
| Poorest | 144 (20.4) | 283 (40.1) | 426 (61.2) |
| Poorer | 156 (21.0) | 282 (37.9) | 458 (62.2) |
| Middle | 199 (26.7) | 257 (34.5) | 469 (64.0) |
| Richer | 187 (27.1) | 263 (38.0) | 410 (59.9) |
| Richest | 187 (29.5) | 223 (35.2) | 325 (51.8) |
| **Mother's age in 5-year groups** | *p =* 0.008 | *p =* 0.739 | *p =* 0.019 |
| 15-19 | 139 (23.3) | 231 (38.7) | 387 (65.6) |
| 20-24 | 294 (24.6) | 438 (36.7) | 720 (61.2) |
| 25-29 | 218 (24.0) | 338 (37.1) | 521 (57.9) |
| 30-34 | 136 (24.1) | 208 (36.8) | 318 (56.8) |
| 35-39 | 71 (32.6) | 83 (37.9) | 119 (55.1) |
| 40-44 | 14 (46.7) | 7 (23.3) | 20 (64.5) |
| 45-49 | 0 (0.0) | 2 (50.0) | 2 (50.0) |
| **Father's age** | *p =* 0.014 | *p =* 0.170 | *p* < 0.001 |
| Less than 25 years | 104 (24.5) | 159 (37.4) | 287 (68.3) |
| 25-29 | 196 (25.8) | 282 (37.2) | 471 (62.5) |
| 30-34 | 191 (21.8) | 303 (34.6) | 509 (58.9) |
| 35-39 | 186 (23.6) | 317 (40.2) | 447 (57.5) |
| 40 years and above | 189 (29.4) | 227 (35.3) | 364 (57.2) |
| **Mother’s highest educational level** | *p* < 0.001 | *p =* 0.119 | *p* < 0.001 |
| No education | 35 (19.9) | 64 (36.4) | 113 (65.3) |
| Primary | 172 (21.9) | 297 (37.9) | 500 (64.5) |
| Secondary | 462 (24.3) | 729 (38.3) | 1140 (60.5) |
| Higher | 205 (31.3) | 217 (33.1) | 335 (51.9) |
| **Father's highest educational level** | *p =* 0.002 | *p* < 0.001 | *p* < 0.001 |
| No education | 96 (18.6) | 166 (32.2) | 337 (66.2) |
| Primary | 251 (24.9) | 414 (41.0) | 612 (61.8) |
| Secondary | 313 (25.4) | 466 (37.9) | 740 (60.8) |
| Higher | 203 (27.8) | 239 (32.7) | 386 (53.2) |
| **Mother currently working** | *p =* 0.169 | *p* < 0.001 | *p* < 0.001 |
| No | 684 (24.3) | 958 (34.1) | 1733 (62.3) |
| Yes | 189 (26.8) | 349 (49.5) | 355 (50.9) |
| **Mass media exposure of the mother (newspaper/radio/television)** | *p* < 0.001 | *p =* 0.005 | *p* < 0.001 |
| Unexposed | 330 (21.5) | 531 (34.5) | 959 (63.2) |
| Exposed | 543 (27.4) | 776 (39.2) | 1128 (57.6) |
| **The anxiety level of the mother (from GAD-7 scores)** | *p* < 0.001 | *p =* 0.611 | *p =* 0.238 |
| Minimal Anxiety | 655 (23.4) | 1033 (37.0) | 1673 (60.6) |
| Mild to severe anxiety | 218 (30.1) | 275 (38.0) | 415 (58.1) |
| **Depression level of the mother (from PHQ-9 scores)** | *p* < 0.001 | *p =* 0.652 | *p =* 0.014 |
| Minimal or no depression | 622 (23.4) | 981 (36.9) | 1607 (61.2) |
| Mild to severe depression | 251 (29.0) | 327 (37.8) | 481 (56.5) |
| **BMI of the mother (according to CDC)** | *p =* 0.379 | <0.001 | *p =* 0.018 |
| Underweight (<18.5) | 71 (24.9) | 143 (50.2) | 154 (54.6) |
| Normal (18.5-24.9) | 267 (25.2) | 379 (35.7) | 670 (63.8) |
| Overweight (25-29.9) | 103 (29.7) | 114 (32.9) | 196 (57.5) |
| Obesity (>30.0) | 21 (24.7) | 29 (34.5) | 51 (61.4) |
| **Age of the index child** | *P<0.001* | *P<0.001* | *P<0.001* |
| 0-5 months | 61 (6.5) | 33 (3.5) | 903 (92.2) |
| 6-11 months | 212 (21.7) | 350 (35.8) | 573 (59.2) |
| 12-17 months | 247 (33.0) | 386 (51.5) | 309 (41.9) |
| 18-23 months | 353 (41.5) | 538 (63.2) | 302 (35.9) |
| **Gender of the child** | *p =* 0.042 | *p =* 0.718 | *p =* 0.622 |
| Boy | 418 (23.4) | 670 (37.4) | 1055 (59.6) |
| Girl | 455 (26.3) | 637 (36.8) | 1032 (60.5) |
| **Birth order** | *p =* 0.097 | *p =* 0.359 | *p =* 0.267 |
| 1 | 372 (26.7) | 524 (37.7) | 804 (58.4) |
| 2 | 278 (23.7) | 446 (38.1) | 704 (61.1) |
| 3 or more | 223 (23.3) | 337 (35.3) | 580 (61.2) |
| **Currently breastfeeding** | *p < 0.001* | *p = 0.003* | *p < 0.001* |
| No | 97 (43.7) | 103 (46.6) | 107 (48.6) |
| Yes | 776 (23.5) | 1204 (36.5) | 1981 (60.8) |
| **Birth weight** | *p =* 0.031 | *p =* 0.069 | *p =* 0.009 |
| Low birth weight (up to 2500gm) | 164 (26.9) | 202 (33.1) | 352 (58.7) |
| More than 2500gm | 441 (26.0) | 639 (37.6) | 975 (58.0) |
| Didn't measure/don’t know | 269 (22.2) | 466 (38.5) | 760 (63.5) |
| **Both mother and child had PNC** | *p =* 0.568 | *p =* 0.927 | *p =* 0.504 |
| No | 240 (24.1) | 368 (37.0) | 599 (60.9) |
| Yes | 633 (25.1) | 939 (37.2) | 1489 (59.7) |
| **Place of delivery** | *p =* 0.604 | *p =* 0.338 | *p =* 0.191 |
| Non-institutional | 294 (23.9) | 473 (38.5) | 751 (61.9) |
| Public sector | 149 (24.6) | 229 (37.9) | 359 (60.4) |
| Private sector | 430 (25.5) | 605 (35.9) | 977 (58.6) |
